# Supplementary material for: The Cardiac Microenvironment Instructs Divergent Monocyte Fates and Functions in Myocarditis
Source: PubMed Central journal article supplement — Cell Rep. Author manuscript; Available in PMC 2019 Oct 25. (PMC6813836; doi:10.1016/j.celrep.2019.06.007), 2019-07-02
Supplement: NIHMS1533545-supplement-1.pdf [file NIHMS1533545-supplement-1.pdf]

**Cell Reports, Volume 28**

## **Supplemental Information**

### **The Cardiac Microenvironment Instructs Divergent**

### **Monocyte Fates and Functions in Myocarditis**

**Xuezhou Hou, Guobao Chen, William Bracamonte-Baran, Hee Sun Choi, Nicola L. Diny, Jungeun Sung, David Hughes, Taejoon Won, Megan Kay Wood, Monica V. Talor, David Joel Hackam, Karin Klingel, Giovanni Davogustto, Heinrich Taegtmeyer, Isabelle Coppens, Jobert G. Barin, and Daniela Čiháková**

Figure S1

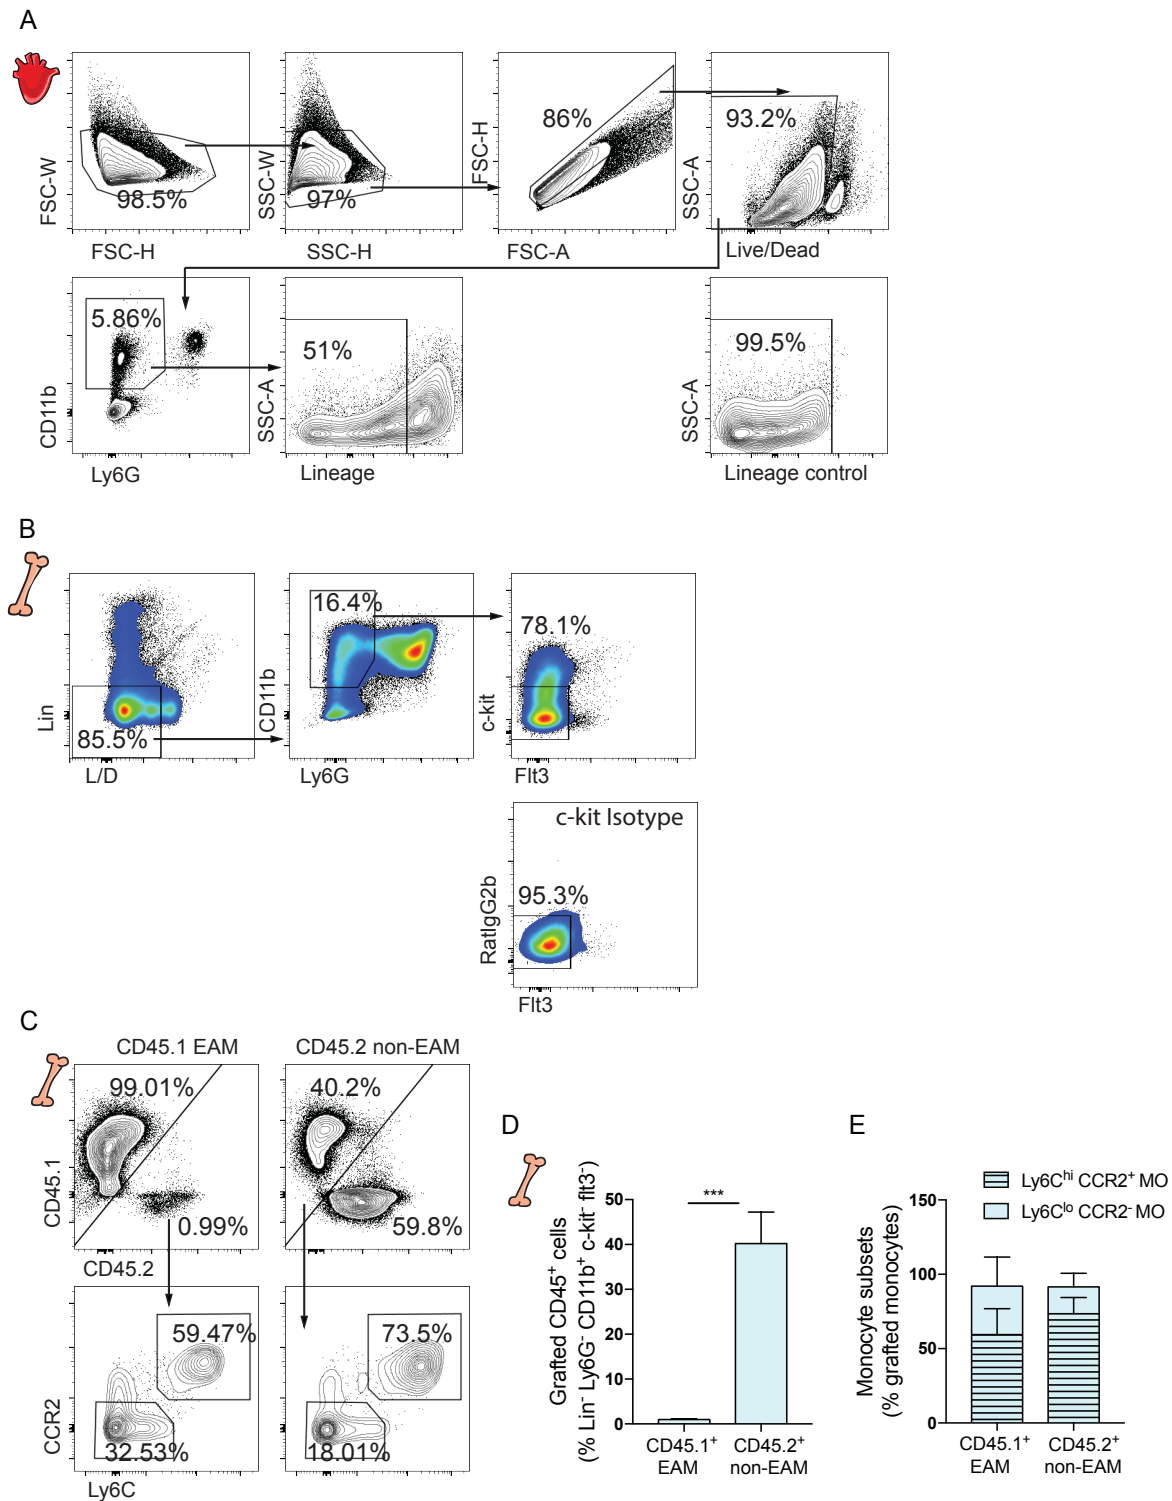

**Figure S1. Characterization of monocytes and/or macrophages in murine hearts and bone marrows during EAM development. Related to Figure 1.** (A) Representative gating strategy showing identification of CD11b<sup>+</sup>Ly6G<sup>-</sup>Lin<sup>-</sup> myeloid cells in the hearts and (B) mature Lin<sup>-</sup>CD11b<sup>+</sup>Ly6G<sup>-</sup>c-kit<sup>-</sup>Flt3<sup>-</sup> monocytes in the BM. (C) Flow cytometry plots showing grafted Lin<sup>-</sup>CD11b<sup>+</sup>Ly6G<sup>-</sup>c-kit<sup>-</sup>Flt3<sup>-</sup> monocytes that consist of both Ly6C<sup>hi</sup>CCR2<sup>+</sup> and Ly6C<sup>lo</sup>CCR2<sup>-</sup> populations in the BM. (D) Percentages of grafted Lin<sup>-</sup>CD11b<sup>+</sup>Ly6G<sup>-</sup>c-kit<sup>-</sup>Flt3<sup>-</sup> monocytes in the BM. (E) Percentages of grafted Ly6C<sup>hi</sup> and Ly6C<sup>lo</sup> monocytes out of total grafted monocytes in the BM. (A) (B) Lineage includes CD3e, B220, NKp46, CD90.2 and Ter119. Data are representative of two independent experiments with biological triplicates. Groups were compared using Student's *t* test. \*\*\*, *P* < 0.001. (D, E) All data were presented as mean ± SD.

Figure S2

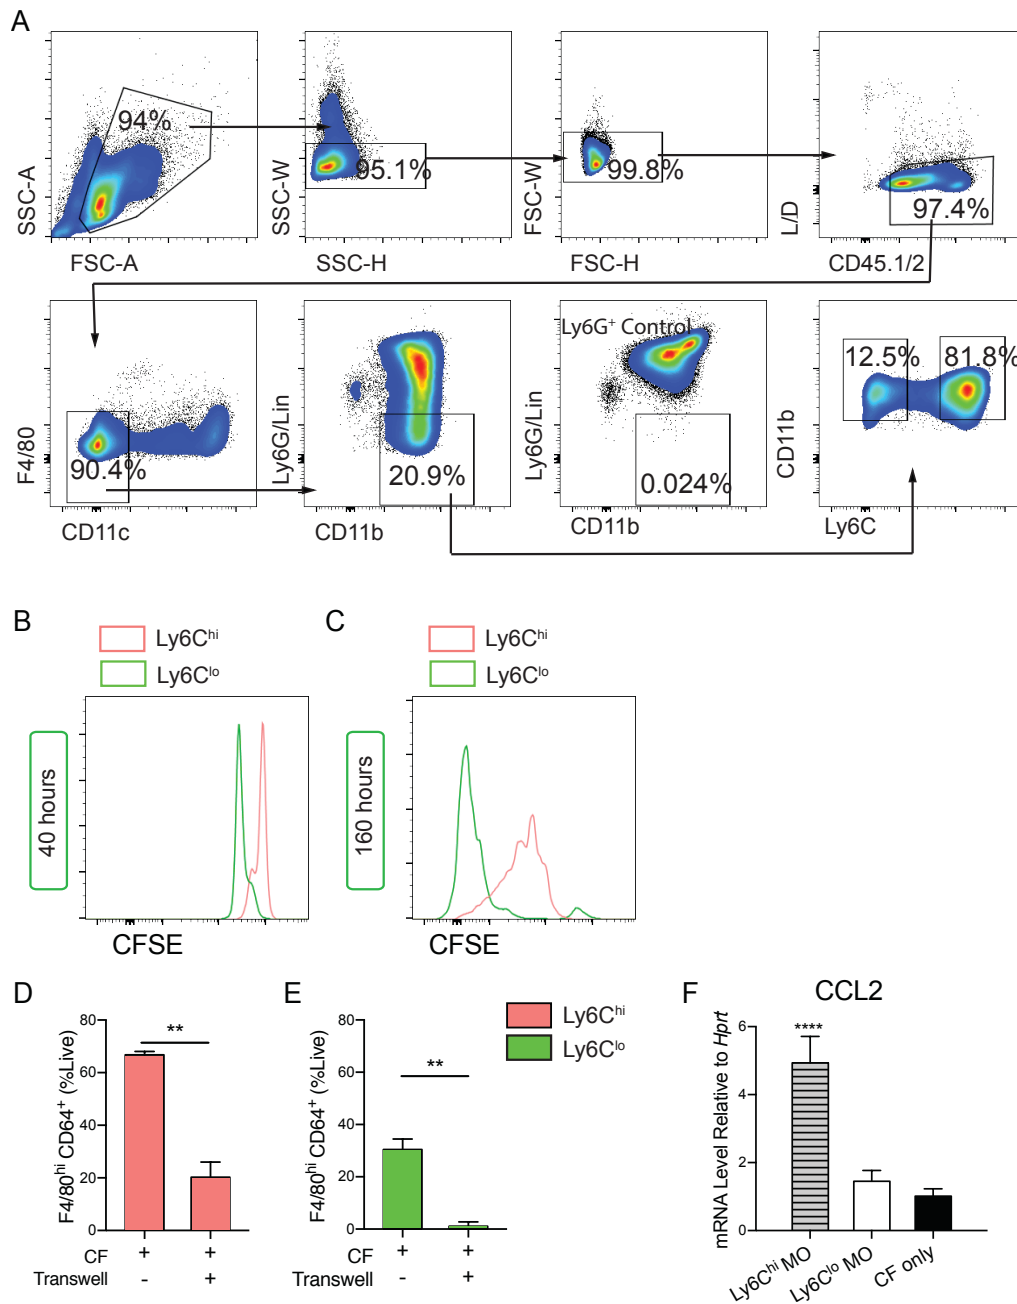

**Figure S2. *In vitro* co-culture of splenic Ly6C<sup>hi</sup> or Ly6C<sup>lo</sup> monocytes with cardiac fibroblasts. Related to Figure 2.** (A) Representative gating strategy of FACS sorted splenic Ly6C<sup>hi</sup> and Ly6C<sup>lo</sup> monocytes from WT (or IL-17Ra<sup>-/-</sup>) EAM mice. Cells were gated stringently to obtain pure populations. Lineage marks include CD3e, CD19, NKp46, CD49b. (B) Histograms of MFI showing CFSE staining of viable Ly6C<sup>hi</sup> and Ly6C<sup>lo</sup> monocytes at 40 hours and (C) at 160 hours. (D) A transwell co-culture was established with cardiac fibroblasts in the lower chamber and either Ly6C<sup>hi</sup> or Ly6C<sup>lo</sup> monocytes on the upper chamber. Cells were separated with a 0.4-micron pore size membrane. We examined Ly6C<sup>hi</sup> and (E) Ly6C<sup>lo</sup> monocyte-to-macrophage differentiation at 40 hours and 160 hours respectively. (F) Separately, cardiac fibroblasts were harvested in 40 hours and *Ccl2* mRNA levels were assessed. Data are representative of two independent experiments with technical triplicates. (C, D) Groups were compared using Student's *t* test. \*\*, *P* < 0.01. (E) Groups were compared using one-way ANOVA followed by Tukey test. \*\*\*\*, *P* < 0.0001. (D – F) All data were presented as mean ± SD.

Figure S3

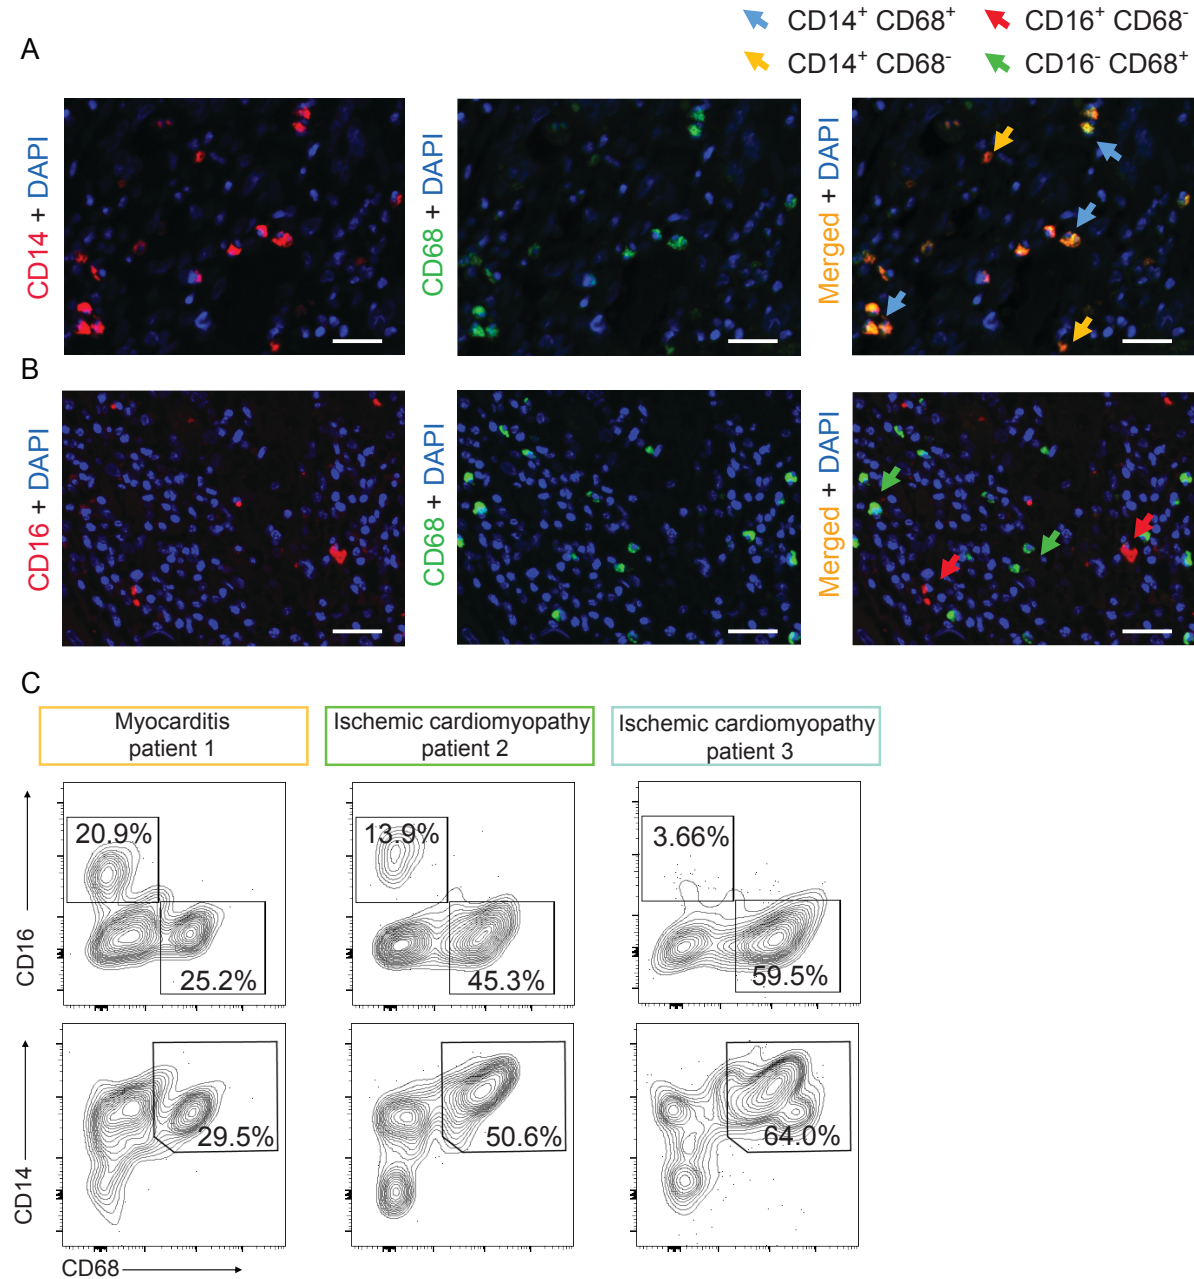

**Figure S3. Examination of human macrophage ontogeny. Related to Figure 3 and Table S1.** (A) Immunofluorescent (IF) staining in a human giant cell myocarditis biopsy sample showing numerous  $CD14^+CD68^+$  double positive cells (blue arrows) and some  $CD14^+CD68^-$  single positive cells (yellow arrows). (B) The same biopsy sample showing numerous  $CD16^-CD68^+$  single positive cells (green arrows) and few  $CD16^+CD68^-$  single positive cells (red arrows). Bars: 50  $\mu$ m. (C) Gating of  $CD16^+$  or  $CD14^+$  and  $CD68^+$  from viable  $CD45^+CD11b^+$  myeloid cells in the hearts of three HF patients with ventricular assist device explant.



Figure S4

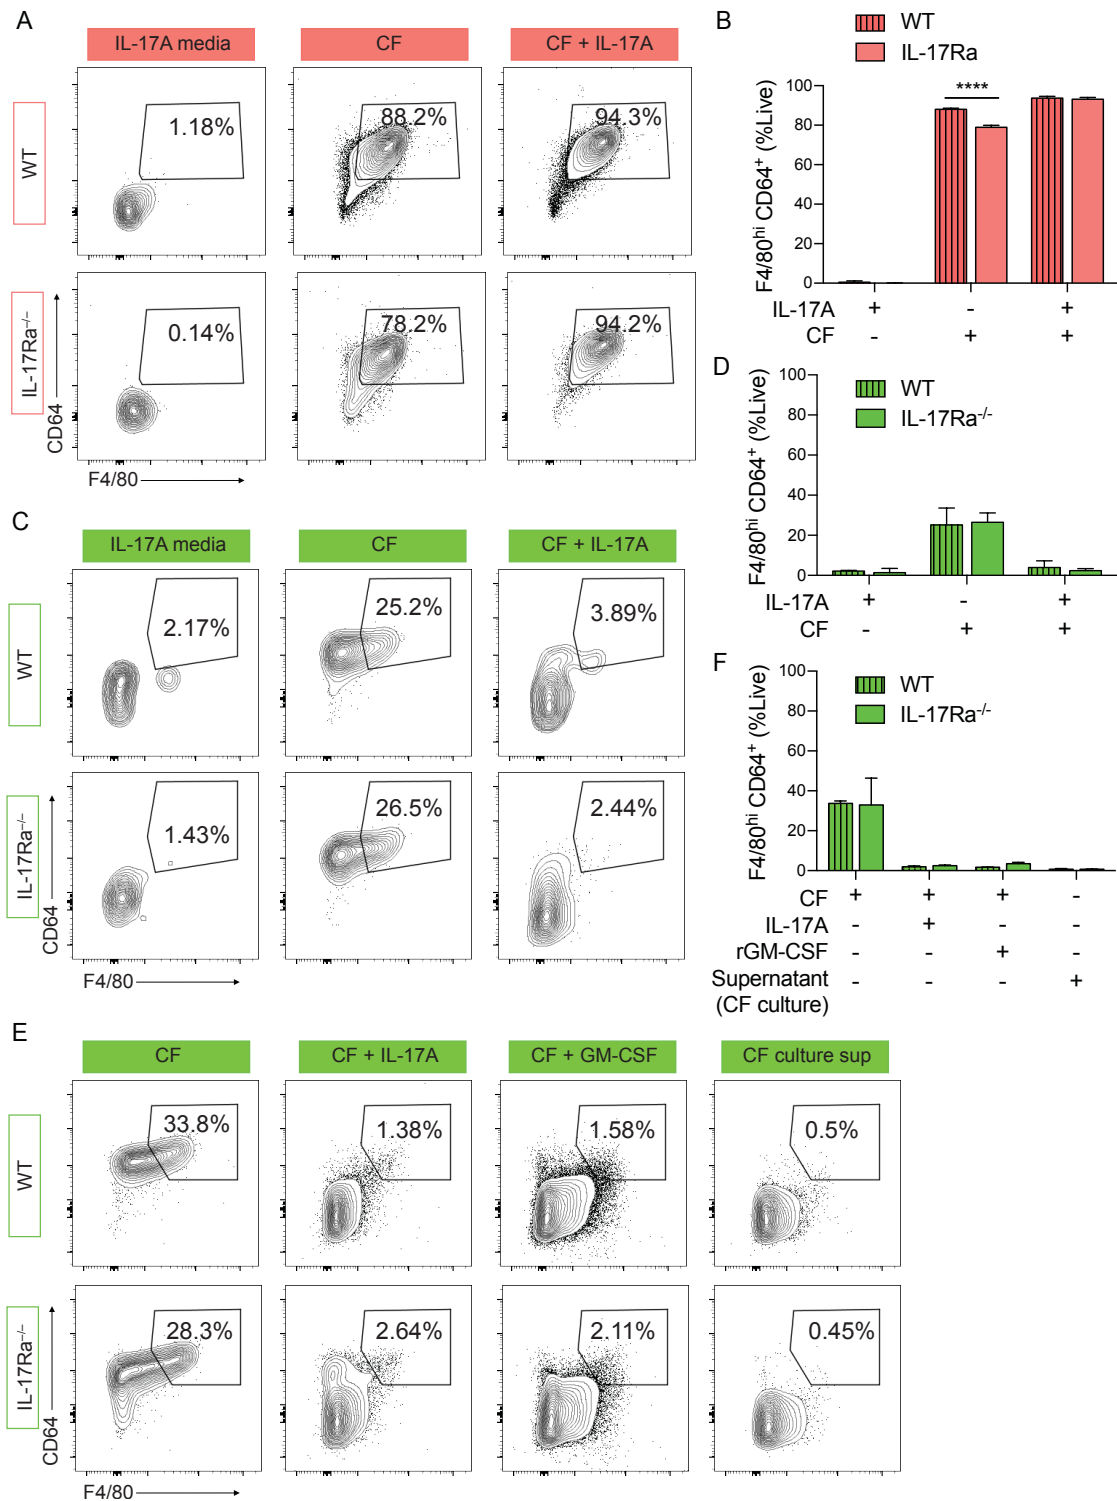

**Figure S4. Validation of WT monocyte differentiation *in vitro*. Related to Figure 4.** Cardiac fibroblasts were harvested from WT naïve mice, whereas monocytes were sorted from either EAM WT or EAM IL-17Ra<sup>-/-</sup> mice. (A) Flow cytometry plots showing differentiation status of splenic Ly6C<sup>hi</sup> monocyte from either WT or IL-17Ra<sup>-/-</sup> mice. (B) Percentages of Ly6C<sup>hi</sup> MDMs. (C) Flow cytometry plots showing differentiation status of splenic Ly6C<sup>lo</sup> monocyte from either WT or IL-17Ra<sup>-/-</sup> mice. (D) Percentages of Ly6C<sup>lo</sup> MDMs. (E) Flow cytometry plots showing the inhibitory effects of IL-17A and rGM-CSF on Ly6C<sup>lo</sup> monocyte-to-macrophage differentiation, regardless of monocyte sources. Cardiac fibroblasts supernatant alone was insufficient in promoting WT and IL-17Ra<sup>-/-</sup> Ly6C<sup>lo</sup> monocyte-to-macrophage differentiation. (F) Percentages of Ly6C<sup>lo</sup> MDMs. Groups were compared using two-way ANOVA followed by Sidak test. \*\*\*\*, P < 0.0001. (B, D, F) All data were presented as mean ± SD.

Figure S5

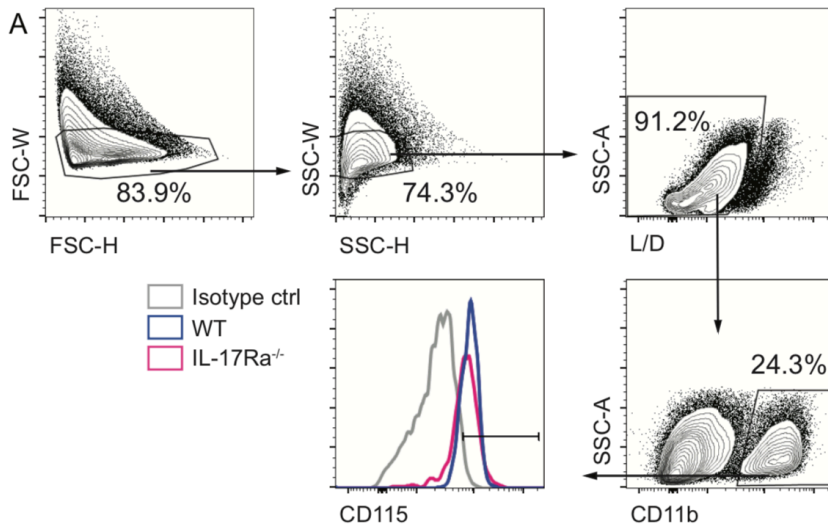

**Figure S5. Monocyte gating strategy in the heart. Related to Figure 5.** (A) Representative gating strategy to identify monocytes in the hearts. Appropriate CD115 isotype control was included.

Figure S6

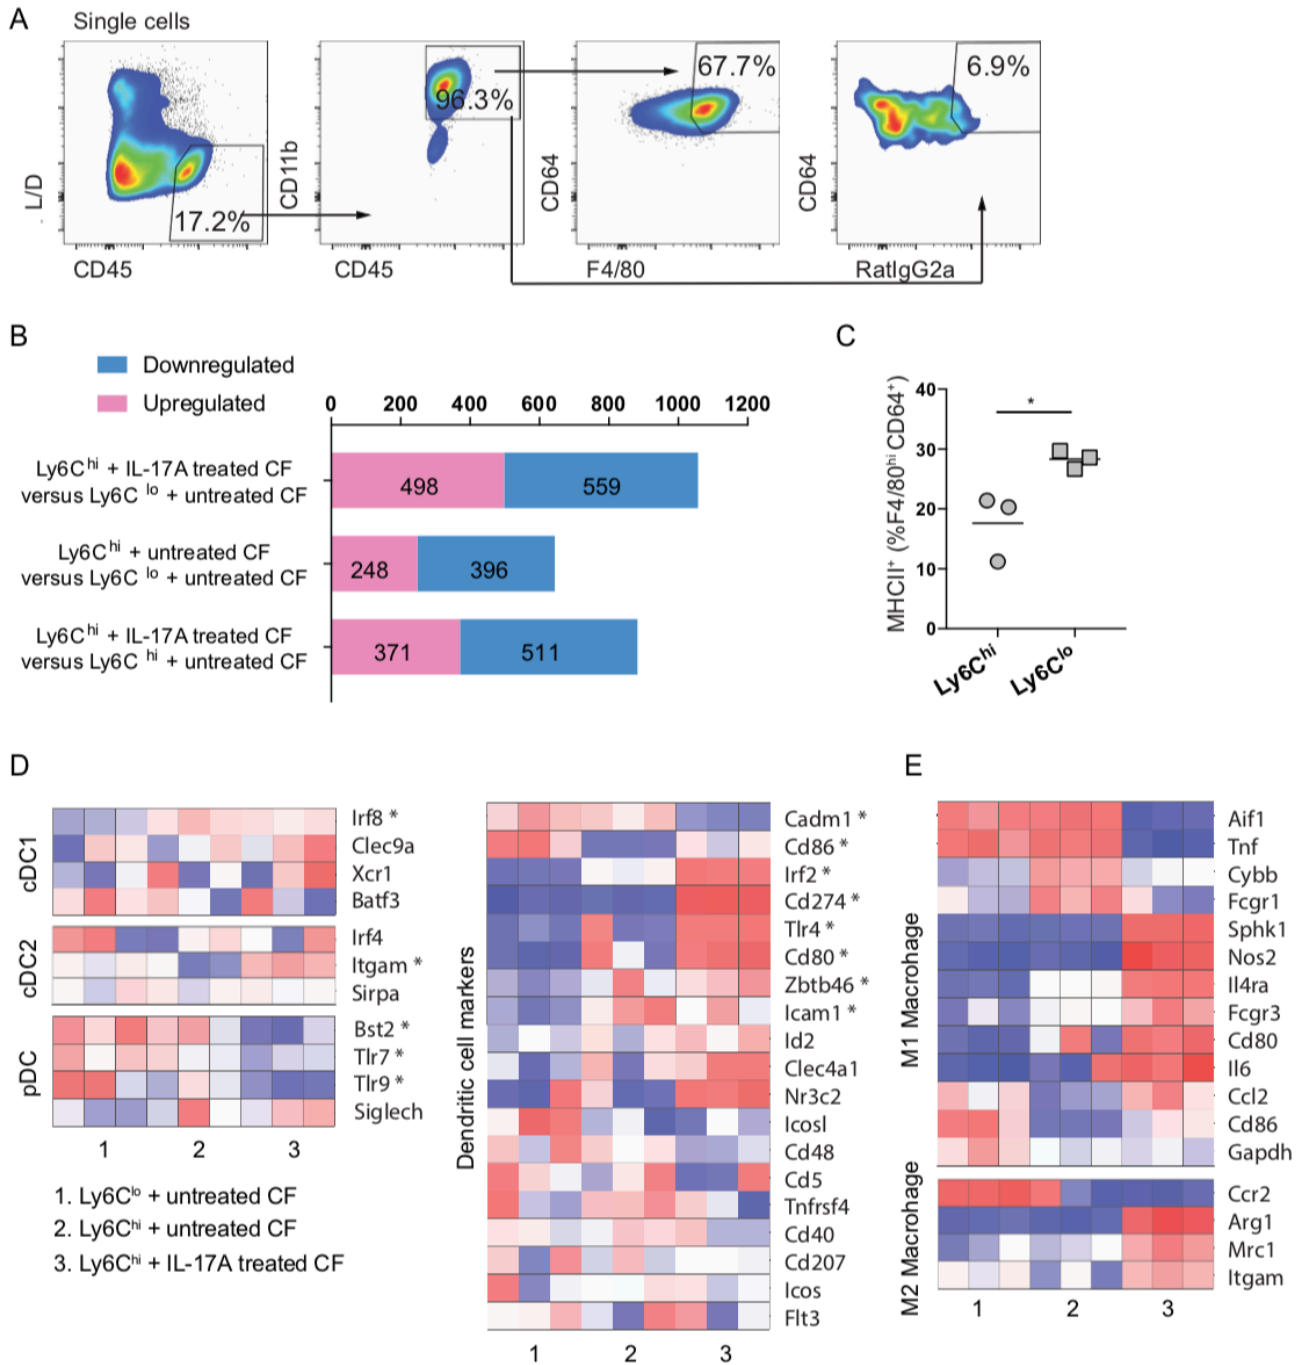

**Figure S6. Validating the identities of *in vitro* derived macrophage subsets. Related to Figure 6.** (A) Representative gating strategy used to FACS sort CD45<sup>+</sup>CD11b<sup>+</sup>CD64<sup>+</sup>F4/80<sup>hi</sup> macrophages derived from the *in vitro* monocyte-fibroblast co-culture. F4/80 isotype control RatlgG2a was included. (B) Bar graph displaying the number of differentially regulated genes, using a threshold of 2× fold change and p value < 0.05. (C) Frequencies of MHCII<sup>+</sup> subset out of total intracardially injected MDMs in IL-17Ra<sup>-/-</sup> recipient mice. (D) Heat maps showing relative fold changes in genes associated with dendritic cells and (E) M1/M2 dichotomy of macrophages. (C) Data are representative of two independent experiments with biological triplicates. Groups were compared using Student's *t* test. \*, P < 0.05. All data were presented as mean ± SD. (D) \* Represent selected genes displayed on the heat maps have a one-way ANOVA p value < 0.05 among groups compared.

Figure S7

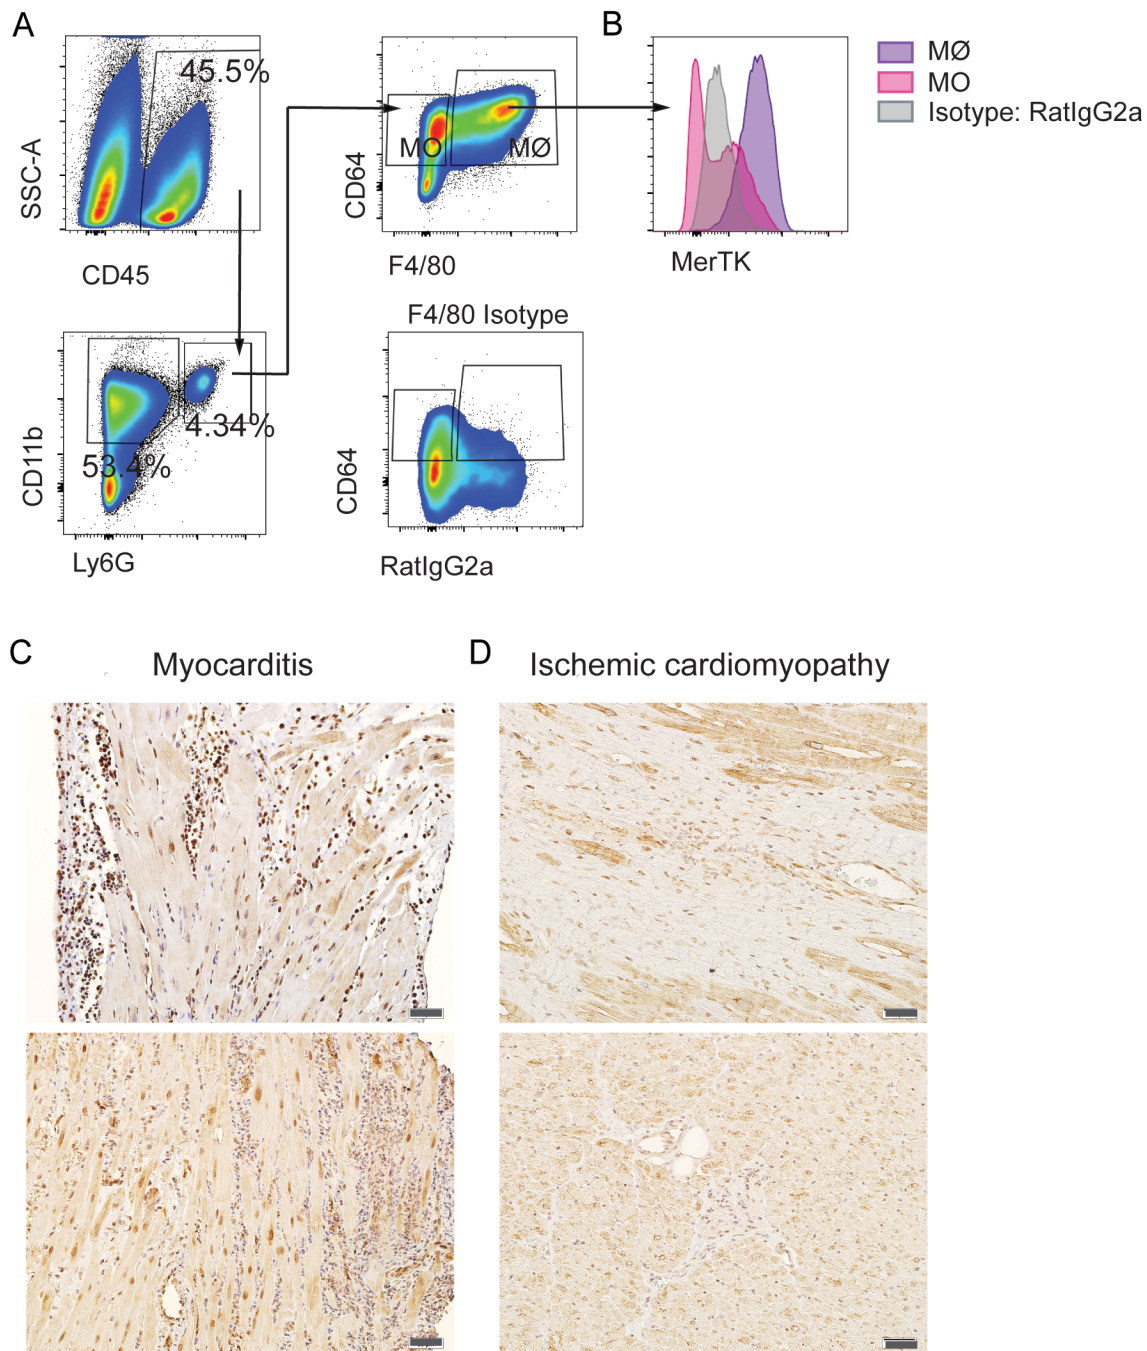

**Figure S7. Murine MerTK expression levels by monocytes/macrophages and IL-17A levels in human endomyocardial biopsies. Related to Figure 7 and Table S2, 3.** (A) Representative gating strategy of concatenated CD45<sup>+</sup>Ly6G<sup>-</sup>CD11b<sup>+</sup>F4/80<sup>hi</sup>CD64<sup>+</sup> macrophages and CD45<sup>+</sup>Ly6G<sup>-</sup>CD11b<sup>+</sup>F4/80<sup>-</sup>CD64<sup>+</sup> monocytes in the hearts. Appropriate F4/80 isotype control was shown. (B) Macrophages and monocytes' MerTK expression level as compared to isotype control for MerTK. (C) Immunohistochemistry staining for human IL-17A in the hearts of representative median implant samples of myocarditis patients and (D) ischemic cardiomyopathy patients.

| Sample             | Myocarditis patient 1 | Ischemic cardiomyopathy patient 2                                                                              | Ischemic cardiomyopathy patient 3                                     |
|--------------------|-----------------------|----------------------------------------------------------------------------------------------------------------|-----------------------------------------------------------------------|
| Age                | 32                    | 61                                                                                                             | 57                                                                    |
| Race/Ethnicity     | Caucasian             | Caucasian                                                                                                      | Caucasian                                                             |
| Gender             | Male                  | Male                                                                                                           | Male                                                                  |
| Etiology           | Viral myocarditis     | Ischemic                                                                                                       | Ischemic                                                              |
| Type of VAD        | HM II 10600           | 3000 rpm                                                                                                       | 8000 rpm                                                              |
| Diabetes           | No                    | No                                                                                                             | Yes                                                                   |
| Height             | 175 cm                | 170 cm                                                                                                         | 180 cm                                                                |
| Weight             | 86.63 Kg              | 86.63 Kg                                                                                                       | 100.69 Kg                                                             |
| LVIDd              | 3.9 cm                | 6.6 cm                                                                                                         | 6.5 cm                                                                |
| LVPWd              | 1.3 cm                | 0.9 cm                                                                                                         | 1.0 cm                                                                |
| IVSd               | 1.6 cm                | 1.1 cm                                                                                                         | 1.0 cm                                                                |
| EF                 |                       |                                                                                                                |                                                                       |
| Troponin level     |                       | <0.15                                                                                                          |                                                                       |
| Days on VAD        | 1167                  | 270                                                                                                            | 432                                                                   |
| Explant reason     | OHT                   | OHT                                                                                                            | OHT                                                                   |
| Dead               | No                    | No                                                                                                             | No                                                                    |
| BNP                |                       | 185                                                                                                            | 376                                                                   |
| CKMB               |                       | 1.7                                                                                                            | 0.5                                                                   |
| Tissue Amount (mg) | 307.5 (LV)            | 294.1 (LV)                                                                                                     | 339.6 (LV)                                                            |
| Path explant       |                       | cardiomegaly, concentric LVH, posterior wall fibrosis, fatty infiltration of IVS, mild fibrous epicarditis CAD | cardiomegaly with concentric biventricular hypertrophy, CAD, fibrosis |

**Table S1. Patient information part 1. Related to Figure 3 and S3.** Patient information from individuals with end stage HF who underwent implantation of left ventricular assist device at the Texas Heart Institute. Tissues were collected for flow cytometry assessments. OHT: Orthotopic Heart Transplant.

| Sample             | Myocarditis patient I | Myocarditis patient II                        | Myocarditis patient III  | Myocarditis patient IV        |
|--------------------|-----------------------|-----------------------------------------------|--------------------------|-------------------------------|
| Age                | 43                    | 25                                            | 15                       | 63                            |
| Race/Ethnicity     |                       | Hispanic                                      | African American         | Caucasian                     |
| Gender             | Male                  | Male                                          | Male                     | Male                          |
| Etiology           | Viral                 | Viral                                         | Viral                    | Viral                         |
| Type of VAD        | HM XVE                | HM II                                         | HM II                    | Jarvik 2                      |
| Diabetes           | No                    | No                                            | No                       | Yes                           |
| Height             | 188 cm                | 172 cm                                        | 185 cm                   | 183 cm                        |
| Weight             | 100.01 Kg             | 100.69 Kg                                     | 113.39 Kg                | 87.54 Kg                      |
| LVIDd              |                       | 7.0 cm                                        | 7.2 cm                   | 6.7 cm                        |
| LVPWd              |                       | 1.1 cm                                        | 0.8 cm                   | 0.7 cm                        |
| IVSd               |                       | 1.1 cm                                        | 0.9 cm                   | 0.7 cm                        |
| EF                 | 10 – 15%              | <20%                                          | <15%                     | <15%                          |
| Troponin level     |                       | <0.15                                         |                          |                               |
| Days on VAD        | 50                    | 502                                           | 1121                     | 600                           |
| Explant reason     | OHT                   | OHT                                           | To Jarvik, died 2d after | OHT                           |
| Dead               | Yes                   | No                                            | Yes                      | No                            |
| BNP                |                       | 423                                           | 1163                     |                               |
| CKMB               |                       | 0.2                                           |                          | 2.2                           |
| Tissue Amount (mg) | 44                    | 130                                           | 231.4                    | 245.5                         |
| Path Implant       |                       | focal interstitial edema, minimal hypertrophy | myocyte hypertrophy      | myocyte hypertrophy and lysis |

**Table S2. Patient information part 2. Related to Figure 7 and S7.** Viral myocarditis patient information from individuals with end stage HF who underwent explant of left ventricular assist device and orthotopic heart transplant at the Texas Heart Institute. Tissues were collected for IHC and flow cytometry assessments. OHT: Orthotopic Heart Transplant.

| Sample             | Ischemic cardiomyopathy patient I | Ischemic cardiomyopathy patient II                                         | Ischemic cardiomyopathy patient III                | Ischemic cardiomyopathy patient IV                | Ischemic cardiomyopathy patient V    |
|--------------------|-----------------------------------|----------------------------------------------------------------------------|----------------------------------------------------|---------------------------------------------------|--------------------------------------|
| Age                | 61                                | 59                                                                         | 64                                                 | 56                                                | 72                                   |
| Race/Ethnicity     | Caucasian                         | Caucasian                                                                  | Hispanic                                           | Caucasian                                         | Caucasian                            |
| Gender             | Male                              | Male                                                                       | Male                                               | Male                                              | Male                                 |
| Etiology           | Ischemic                          | Ischemic                                                                   | Ischemic                                           | Ischemic                                          | Ischemic                             |
| Type of VAD        | HM II                             | HW                                                                         | HM II                                              | HM II                                             | HW                                   |
| Diabetes           | No                                | No                                                                         | Yes                                                | Yes                                               | Yes                                  |
| Height             | 170 cm                            | 170 cm                                                                     | 170 cm                                             | 180 cm                                            | 178 cm                               |
| Weight             | 77.11 Kg                          | 73.48 Kg                                                                   | 90.71 Kg                                           | 97.97 Kg                                          | 69.39 Kg                             |
| LVIDd              | 6.92 cm                           | 7.2 cm                                                                     | 7.0 cm                                             | 8.0 cm                                            | 6.9 cm                               |
| LVPWd              | 1.1 cm                            | 1.1 cm                                                                     | 1.0 cm                                             | 1.1 cm                                            | 1.0 cm                               |
| IVSd               | 0.63 cm                           | 0.9 cm                                                                     | 1.1 cm                                             | 1.0 cm                                            | 1.1 cm                               |
| EF                 | 20%                               | 30%                                                                        | <15%                                               | 20%                                               | <20%                                 |
| Troponin level     | 0.06                              | <0.15                                                                      | <0.15                                              |                                                   | <0.15                                |
| Days on VAD        | 270                               | 452                                                                        | 363                                                | 432                                               | 182                                  |
| Explant reason     | OHT                               | OHT                                                                        | OHT                                                | OHT                                               | OHT                                  |
| Dead               | No                                | No                                                                         | yes                                                | No                                                | No                                   |
| BNP                | 2983                              | 222                                                                        | 1130                                               | 283                                               | 240                                  |
| CKMB               | 1.6                               | 1.2                                                                        | 5.9                                                |                                                   | 0.2                                  |
| Tissue Amount (mg) | 273                               | 251                                                                        | 240.6                                              | 271.9                                             | 218                                  |
| Path Implant       | myocyte hypertrophy               | Myocyte hypertrophy, interstitial and replacement-type myocardial fibrosis | severe myocyte hypertrophy with extensive fibrosis | myocyte hypertrophy, patchy interstitial fibrosis | Replacement type myocardial fibrosis |

**Table S3. Patient information part 3. Related to Figure 7 and S7.** Ischemic cardiomyopathy patient information from individuals with end stage HF who underwent explant of left ventricular assist device and orthotopic heart transplant at the Texas Heart Institute. Tissues were collected for IHC and flow cytometry assessments. OHT: Orthotopic Heart Transplant.
